1 **A prospective evaluation of inter-rater agreement of routine medical records**  
2 **audits at a large general hospital in São Paulo, Brazil.**

3  
4 Ana Carolina Cintra Nunes Mafra\*<sup>1,2</sup>, João Luiz Miraglia<sup>1</sup>, Fernando Antonio Basile  
5 Colugnati<sup>3</sup>, Gilberto Soares Lourenço Padilha<sup>4</sup>, Renata Rafaella Santos Tadeucci<sup>1,2</sup>,  
6 Ederson Almeida<sup>1</sup>, Mario Maia Bracco<sup>1,2,4</sup>

7  
8 <sup>1</sup>Hospital Israelita Albert Einstein, São Paulo, Brasil

9 <sup>2</sup>Hospital Municipal Dr. Moysés Deutsch – M'Boi Mirim, São Paulo, Brasil

10 <sup>3</sup>Universidade Federal de Juiz de Fora, School of Medicine, Juiz de Fora, Brasil

11 <sup>4</sup>Centro de Estudos e Pesquisas Dr. João Amorim – CEJAM, São Paulo, Brasil

12  
13 \*Corresponding author

14 Avenida Brigadeiro Faria Lima, 1188, Jardim Paulistano, São Paulo – SP, Brasil CEP  
15 01451-001; e-mail: ana.mafra@einstein.br; telephone number: 55 11 2151-0906.

16  
17 Word count: 2.111

27 **ABSTRACT**

28 **Objectives** To evaluate the inter-rater agreement (IRA) among members of the Patient's  
29 Health Record Review Board (PHRRB), in routine auditing of medical records, and the  
30 impact of periodic discussions of results with raters.

31 **Design:** Prospective longitudinal study conducted between July of 2015 and April of  
32 2016.

33 **Setting:** Hospital Municipal Dr. Moysés Deutsch, a large public hospital in São Paulo.

34 **Participants:** The PHRRB was composed of 12 physicians, 9 nurses and 3  
35 physiotherapists, who audited medical records, monthly, with the number of raters  
36 changing throughout the study.

37 **Interventions:** It was carried out PHRRB meetings in order to reach a consensus on  
38 criteria that the members have to rate in the auditing process. It was created a review  
39 chart that raters should verify the registry of patient's secondary diagnosis, chief  
40 complaint, history of presenting complaint, past medical history, medication history,  
41 physical exam and diagnostic testing. It was obtained the IRA every three months.

42 **Measures:** The Gwet's AC1 coefficient and Proportion of Agreement (PA) were  
43 calculated to evaluate the IRA for each item over time.

44 **Results:** The study included 1884 items from 239 records with an overall full  
45 agreement among raters of 71.2%. A significant IRA increase by 16.5% (OR=1.17;  
46 95% CI=1.03—1.32; p=0.014) was found in the routine PHRRB auditing, with no  
47 significant differences between the PA and the Gwet's AC1, that showed a similar  
48 evolution over time. The PA decreased by 27.1% when at least one of the raters was  
49 absent from the review meeting (OR=0.73; 95% CI=0.53—1.00; p=0.048).

50 **Conclusions:** Medical record quality has been associated with the quality of care and  
51 could be optimized and improved by targeted interventions. The PA and the Gwet's

52 AC1 are suitable agreement coefficients that are feasible to be incorporated in the  
53 routine of PHRRB evaluation process.

54 **Keywords:** Inter-rater agreement; Longitudinal agreement; medical quality register;  
55 audit; Gwet's AC1.

56

## 57 **STRENGTHS AND LIMITATIONS OF THIS STUDY**

- 58 • Implementation of a scientific method in a routine task of data generation of a  
59 PHRRB.
- 60 • Prospective longitudinal design evaluating inter-rater agreement over time and  
61 associated factors.
- 62 • Agreement comparisons among more than two simultaneous raters.
- 63 • Relatively short follow-up.
- 64 • Results are not generalizable to other health facilities.

65

## 66 **INTRODUCTION**

67 Adequate medical recordkeeping is an essential part of good health professional practice  
68 that makes it possible to evaluate and improve the quality of health care. In addition,  
69 medical records should also be used as a learning tool, far beyond the medical  
70 management of patients, but also improving the coordination and continuity of care and  
71 supporting decision making, avoiding adverse events that can compromise patient  
72 safety, mainly in hospitals.<sup>1,2</sup>

73 Auditing patient's medical records is a practice that aims to ensure the quality of patient  
74 care throughout reliable information registered by health professionals during patient  
75 visits or admissions in healthcare units. The Brazilian Medical Council establishes that  
76 patients' records review commissions is mandatory for health services, since 2002.<sup>3</sup>

77 However, the reliability of the auditing processes is a matter closely related to the inter-  
78 rater agreement (IRA) when different raters assign the same precise value for each item  
79 being observed<sup>4,5</sup>. Some review studies assessing adverse events have been shown to  
80 suffer from poor to moderate inter-rater reliability (IRR)<sup>6,7</sup>. In addition, IRR is rarely  
81 described or discussed in research papers based on data abstracted from medical records  
82 and there are no standard methods for assessing IRR<sup>8</sup>. Moreover, time constraints and  
83 work overload are frequent situations faced by health staff to perform tasks involving  
84 data management resulting in low data quality that can affect managerial decision-  
85 making. Therefore, the evaluation of suitable methods for data abstraction from this  
86 source is essential.<sup>9</sup>

87 When such studies employ multiple raters it is important to have a strategy to document  
88 adequate levels of agreement between them, and the Cohen's Kappa coefficient ( $\kappa$ ) is a  
89 well-known measure.<sup>10</sup> However, it is affected by the skewed distributions of categories  
90 (the prevalence paradox) and by the degree to which raters disagree (the bias  
91 problem).<sup>11,12</sup>

92 Kilem Li Gwet proposed a new agreement coefficient to fix those limitations and which  
93 can be used with any number of raters requiring a simple categorical rating system.<sup>13,14</sup>

94 The objective of this study was to evaluate the IRA of routine audits of medical records  
95 and the impact of periodic discussions among raters, to refine auditing criteria, in a large  
96 general hospital as part of an intervention to improve the quality of the medical records  
97 related to essential content. In addition, the study also aimed to compare the estimates  
98 of the percent agreement (PA) to the Gwet's agreement coefficient (AC1) and to  
99 identify possible factors associated with the PA.

100

101 **METHODS**

102 **Population and setting**

103 This was a prospective longitudinal study conducted between July of 2015 and April of  
104 2016 at the Hospital Municipal Dr. Moysés Deutsch (HMMD), a large public general  
105 hospital (300 beds) located in the southern zone in the city of São Paulo, Brazil, an  
106 impoverished region encompassing approximately 600,000 inhabitants. The present  
107 study was part of a larger intervention aimed at improving the quality of patient care  
108 throughout a tailored integration strategies among health facilities in its Regional Health  
109 Care Network, that used a Lean Six Sigma methodology to get improvements of data  
110 quality registered in the medical records, with potential benefits to the patients, to  
111 decision-making actions and processes, and to obtain scientific quality over these data  
112 for research purposes, as published elsewhere.<sup>15</sup>

113 **Audit of medical records and review meetings**

114 The HMMD maintains a routine auditing process that includes 13% of all medical  
115 records of patients discharged in the previous month, carried out by the Patient's  
116 Medical Record Review Board (PMRRB), that was composed by 24 nominated health  
117 professionals from several HMMD staff, medical, nurses and multi-professional staff  
118 coordinators, or delegated by them, from all clinical departments, 12 physicians, 9  
119 nurses and 3 physiotherapists. It is a time-costly procedure because competes with the  
120 patient-care tasks among these professionals. As a consequence, is common that the  
121 audits have happened isolated by each PMRRB member without any criteria alignment,  
122 to rate the items in the audit chart, which compromise the whole quality of the auditing  
123 process. However, the patient's medical charts were selected in a non-aleatory way,  
124 lacking representativeness over the results achieved, compromising the accuracy and  
125 generalizability of these data.

126 The planned intervention has used the Lean-6-Sigma methodology, that is largely  
127 utilized to aggregate values in several HMMD quality improvement processes, that is  
128 part of the environment culture among the professionals.<sup>15</sup>

129 The proposed actions included at least one team-leader from each HMMD clinical  
130 department, preferably its coordinator, which increased the PMRRB components,  
131 reducing the total medical charts to be reviewed by each member. It was refined the  
132 audit chart by all members through discussions about the relevance of the information  
133 that should be registered by their health teams, answering the question: ‘Which  
134 information cannot be missed in the patient’s medical record?’ The chosen items were  
135 then discussed, to define the criteria that should be rated as adequate, inadequate,  
136 incomplete, or not applicable (Table 1). Finally, the patient’s medical records have  
137 become selected randomly, weighed by the discharge proportion of each department.

138

139 **Table 1:** Audited items.

| <b>Audited items</b>            | <b>Options to rate</b>                             |
|---------------------------------|----------------------------------------------------|
| Secondary diagnosis             | Adequate or inadequate                             |
| Chief complaint                 | Not applicable, adequate or inadequate             |
| History of presenting complaint | Not applicable, adequate or inadequate             |
| Past medical history            | Not applicable, adequate or inadequate             |
| Medication history              | Not applicable, adequate or inadequate             |
| Complete medical history        | Not applicable, adequate, inadequate or incomplete |
| Physical exam                   | Adequate or inadequate                             |
| Diagnostic testing              | Not applicable, adequate or inadequate             |

140

141 The number of raters varying throughout the study as shown in Table 2.

142 Every three months during the study period, and in addition to the routine audits, five to  
143 six medical records were randomly allocated to the same two or three independent raters  
144 of the same professional category in order to evaluate the IRA. The study also included  
145 review meetings conducted every three months to align assessment criteria based on the  
146 results of the IRA evaluation and the auditing processes.

147

148 **Table 2:** Number of audited medical records and of raters over time.

| <b>Audit period</b>    | <b>Number of medical records for IRA</b> | <b>Number of raters</b> |
|------------------------|------------------------------------------|-------------------------|
| <b>1. 2015 July</b>    | 54                                       | 18                      |
| <b>2. 2015 October</b> | 45                                       | 19                      |
| <b>3. 2016 January</b> | 84                                       | 21                      |
| <b>4. 2016 April</b>   | 56                                       | 16                      |

149

150

### 151 **Statistical methods**

152 The Gwet's AC1 and PA were calculated to evaluate the IRA for each item over time  
153 and were compared through line graphs including 95% confidence intervals (CIs). The  
154 Gwet's AC1 95% CIs<sup>14</sup> were calculated, while the PA were modelled by generalized  
155 estimating equations (GEE), without an intercept<sup>16,17</sup>. The agreement measures were  
156 interpreted following the categories proposed by Altman.<sup>18</sup>

157 Logistic GEE was used to model the PA of all raters along the time, using the value of 1  
158 to full agreement and of 0 to some disagreement, and combining all items for each item  
159 individually. The analyses employed an exchangeable working correlation matrix and  
160 items in a single medical record were considered to be correlated. The model included  
161 as independent variables: professional category, review meeting attendance, and time

162 (audits 1 to 4). A forward stepwise approach was used to variable selection employing a  
163 p-value lesser than or equal to 0.200 in the unadjusted model, and lesser than or equal to  
164 0.050 in the multiple model.

165 The analyses were performed with the R software version 3.2.2<sup>19</sup> with geepack<sup>20</sup>.

166

### 167 **Ethics approval**

168 The study was approved by the research ethics committee of the São Paulo Municipal  
169 Health Department, and the partners' institutions (26981514.3.0000.0086).<sup>21</sup>

170

## 171 **RESULTS**

172 The study included 1884 items from 239 records with an overall full agreement among  
173 raters of 71.2%. The estimated mean PA was found to be larger than the Gwet's AC1  
174 for all audited items (Figure 1), however, these differences were not statistically  
175 significant and the evolution of the two agreement coefficients was similar throughout  
176 the study period. Although a positive trend was found in the agreement of almost all  
177 items, their CIs did not indicate any statistically significant changing over time. In  
178 addition, the coefficients measurements got closer as the agreement got greater. During  
179 the study period, the greatest agreement was "chief complaint", while the lowest one  
180 was "secondary diagnosis".

181

182 Figure 1 here

183

184 The logistic GEE model that included all items (Table 3) found a statistically significant  
185 increase of 17% over time for the PA, but when at least one of the raters was absent



186 from the review meeting, the PA decreased by 27%. Physiotherapists and physicians  
 187 showed higher PA when compared to nurses.

188 In the analysis by item, there was a non-significant positive trend to higher PA for  
 189 History of presenting complaint while physicians presented a significantly higher PA  
 190 over time when compared to nurses for “secondary diagnosis”, “medication history”,  
 191 and “diagnostic testing”. Physiotherapists presented a significantly higher PA over time  
 192 when compared to nurses for “medication history”. Finally, when at least one of the  
 193 raters was absent from the review meeting the PA decreased by 60.5% for “diagnostic  
 194 testing” (Table 4).

195

196 **Table 3:** Estimated odds ratios (OR) for percent agreement. N=1884 items from 239  
 197 records.

|                                             | OR <sup>a</sup> (95% CI) | p value | OR <sup>b</sup> (95% CI) | p value |
|---------------------------------------------|--------------------------|---------|--------------------------|---------|
| Time (audits 1 to 4)                        | 1.20 (1.06–1.35)         | 0.004   | 1.17 (1.03–1.32)         | 0.014   |
| Absent from meeting (Yes)                   | 0.82 (0.60–1.11)         | 0.195   | 0.73 (0.53–1.00)         | 0.048   |
| Professional category<br>(physiotherapists) | 1.49 (0.99–2.26)         | 0.058   | 1.66 (1.10–2.51)         | 0.016   |
| Professional category<br>(physicians)       | 1.45 (1.08–1.93)         | 0.013   | 1.44 (1.07–1.93)         | 0.015   |

198 <sup>a</sup>Estimates obtained by the unadjusted models.

199 <sup>b</sup>Estimates obtained by the multiple models.

200

201 **Table 4:** Estimated odds ratios (OR) of percent agreement by item. N= 239 records.

|                     | OR (95% CI) | p value |
|---------------------|-------------|---------|
| Secondary diagnosis |             |         |

|                                        | <b>OR (95% CI)</b> | <b>p value</b> |
|----------------------------------------|--------------------|----------------|
| Time (audits 1 to 4)                   | 1.02 (0.80–1.30)   | 0.878          |
| Absent from meeting (Yes)              | 0.65 (0.35–1.23)   | 0.187          |
| Prof. category (physiotherapists)      | 1.74 (0.72–4.22)   | 0.221          |
| Prof. category (physicians)            | 1.82 (1.00–3.29)   | 0.048          |
| <b>Chief complaint</b>                 |                    |                |
| Time (audits 1 to 4)                   | 1.20 (0.80–1.80)   | 0.370          |
| Absent from meeting (Yes)              | 0.71 (0.26–1.95)   | 0.507          |
| Prof. category (physiotherapists)      | 1.22 (0.29–5.16)   | 0.786          |
| Prof. category (physicians)            | 0.74 (0.30–1.83)   | 0.519          |
| <b>History of presenting complaint</b> |                    |                |
| Time (audits 1 to 4)                   | 1.31 (0.99–1.74)   | 0.056          |
| Absent from meeting (Yes)              | 0.58 (0.28–1.19)   | 0.138          |
| Prof. category (physiotherapists)      | 1.78 (0.68–4.61)   | 0.238          |
| Prof. category (physicians)            | 1.56 (0.81–3.01)   | 0.182          |
| <b>Past medical history</b>            |                    |                |
| Time (audits 1 to 4)                   | 1.14 (0.86–1.51)   | 0.375          |
| Absent from meeting (Yes)              | 0.70 (0.34–1.44)   | 0.334          |
| Prof. category (physiotherapists)      | 1.12 (0.43–2.91)   | 0.817          |
| Prof. category (physicians)            | 1.35 (0.69–2.63)   | 0.378          |
| <b>Medication history</b>              |                    |                |
| Time (audits 1 to 4)                   | 1.25 (0.96–1.62)   | 0.099          |
| Absent from meeting (Yes)              | 0.83 (0.44–1.57)   | 0.569          |
| Prof. category (physiotherapists)      | 4.25 (1.53–11.77)  | 0.005          |
| Prof. category (physicians)            | 1.87 (1.02–3.41)   | 0.041          |
| <b>Complete medical history</b>        |                    |                |
| Time (audits 1 to 4)                   | 1.22 (0.95–1.57)   | 0.118          |

|                                   | OR (95% CI)      | p value |
|-----------------------------------|------------------|---------|
| Absent from meeting (Yes)         | 0.74 (0.38–1.42) | 0.359   |
| Prof. category (physiotherapists) | 1.15 (0.47–2.82) | 0.753   |
| Prof. category (physicians)       | 0.96 (0.52–1.76) | 0.893   |
| Physical exam                     |                  |         |
| Time (audits 1 to 4)              | 1.07 (0.82–1.39) | 0.616   |
| Absent from meeting (Yes)         | 1.32 (0.68–2.58) | 0.410   |
| Prof. category (physiotherapists) | 2.59 (0.70–9.57) | 0.154   |
| Prof. category (physicians)       | 1.02 (0.54–1.91) | 0.950   |
| Diagnostic testing                |                  |         |
| Time (audits 1 to 4)              | 1.23 (0.91–1.66) | 0.175   |
| Absent from meeting (Yes)         | 0.39 (0.18–0.89) | 0.024   |
| Prof. category (physiotherapists) | 1.52 (0.59–3.92) | 0.387   |
| Prof. category (physicians)       | 3.11 (1.53–6.30) | 0.002   |

202 Prof.: professional.

203

204 **DISCUSSION**

205 A significant increase in the IRA among PHRRB members was found along the time in  
 206 routine medical record auditing processes when periodic evaluations of the agreement  
 207 were performed and discussed by them. On the other hand, but supporting this finding,  
 208 the absence of a member in a review meeting had a negative impact in the PA. In  
 209 addition, the PA and the Gwet’s AC1 were comparable and presented a similar  
 210 evolution over time. Complete medical history was a composite of chief complaint,  
 211 history of complaint, past medical history, and medication history. It was considered  
 212 complete whether all of them were complete, too. Thus, it showed a positive evolution  
 213 in both PA and Gwet AC1 over time from moderate to substantial according to

214 Altman's categories<sup>18</sup>. Only the IRA of secondary diagnosis has remained moderate.  
215 These findings can indicate raters learning curve regarding the positive evolution of  
216 some variables across agreement ranges. Nevertheless, the degree of agreement is  
217 arbitrary making it impossible to define an acceptable level<sup>5</sup>. Thus, the interpretation of  
218 these IRA values is in accordance with the main study objective, i.e., the rater's  
219 concordance in a particular category.

220 The greater IRA among physicians and physiotherapists, when compared to nurses, can  
221 reflect some inconsistency over the evaluations that can be attributed by rater's  
222 selection, training, and accountability<sup>5</sup>, that could be influenced by a misunderstanding  
223 about rating the Complete History item.

224 The strategy applied for the IRA was feasible to be carried out in this real-world  
225 scenario, aggregating value to the auditing process, providing more accurate  
226 information that can be used by health leadership. The use of PA and Gwet's AC1 for  
227 that purpose was successful because they demand a relatively small sample of PMRs to  
228 be audited by each rater, and can provide two data consistency measures.<sup>5,22</sup> Both of the  
229 used indices have reached acceptable levels of agreement<sup>18,23</sup>, according to study  
230 purposes.

231 Following and evaluating the progress of the agreement among raters of PMRs allows  
232 setting up goals and identifying associated factors to improve the audit processes, but  
233 previously proposed models worked with continuous variables<sup>24</sup> or with the Kappa  
234 coefficient<sup>25</sup>, so the use of PA and Gwet AC1 made it possible to model the agreement  
235 of more than two raters over time.

236 The increased IRA highlights the need for more careful planning and evaluation of  
237 medical record audits since this activity is closely related to health care quality and  
238 patient safety improvements efforts.<sup>8,9</sup>

239 Since the present study was conducted under real-world conditions and included  
240 different health providers as raters, this intervention has the potential to be applicable in  
241 other similar settings, taking into consideration that it was carried out in only one  
242 hospital that has a culture of evidence-based improvement interventions, during a short-  
243 term follow-up. Furthermore, the literature on the quality of medical records keeping  
244 and IRA or IRR is scarce what is reflected by the fact that no reviews on the subject  
245 could be identified making the results of this study relevant to improve the body of  
246 knowledge, in the era of data-driven institutions and big data from patient's health  
247 records.

248 Finally, this study did not include an evaluation of the impact in the quality of medical  
249 records what should be the final goal of any routine audit, and therefore should be  
250 evaluated in future studies.

251

## 252 **ACKNOWLEDGEMENTS**

253 We thank all the MRRC members who conducted the audit records and support the  
254 process, the members of the archiving sector as well as the hospital leadership.

255

## 256 **COMPETING INTERESTS STATEMENT**

257 None declared.

258

## 259 **FUNDING STATEMENT**

260 This work was funded by the Brazilian Ministry of Health and São Paulo State Research  
261 Foundation (FAPESP) through Research Program for the Unified Health System-  
262 PPSUS grant 2012/51228-9.

263

264 **DATA SHARING STATEMENT**

265 The dataset is available to researchers who want to explore the data. To request, please  
266 send an email to [ana.mafra@einstein.br](mailto:ana.mafra@einstein.br).

267

268 **AUTHOR'S CONTRIBUTION**

269 ACCNM conceptualized the study design, drafted the initial manuscript, carried out the  
270 random sampling, the statistical analysis, and revised the manuscript. RRST and EA  
271 elaborated and operationalized the intervention, contributed to the study design and  
272 reviewed the manuscript. FABC contributed to the study design and reviewed the  
273 manuscript. JLM and GP contributed to the interpretation of data for the work and  
274 revised the manuscript critically for important intellectual content. MMB elaborated the  
275 study design, operationalized the intervention, drafted and revised the manuscript. All  
276 authors approved the final manuscript as submitted.

277

278 **REFERENCES**

- 279 1. Pirkle CM, Dumont A, Zunzunegui M-V. Medical recordkeeping, essential but  
280 overlooked aspect of quality of care in resource-limited settings. *International*  
281 *Journal for Quality in Health Care*. 2012;**24**(6):564–7. doi:  
282 10.1093/intqhc/mzs034.
- 283 2. Zegers M, de Bruijne MC, Spreeuwenberg P, Wagner C, Groenewegen PP, van  
284 der Wal G. Quality of patient record keeping: an indicator of the quality of care?  
285 *BMJ Quality & Safety*. 2011;**20**(4):314–8. doi: 10.1136/bmjqs.2009.038976.
- 286 3. Conselho Federal de Medicina. Resolução nº 1638. Diário Oficial União nº 153,  
287 seção 1, 09/08/2002, p. 184-5. Available:

- 288 <https://sistemas.cfm.org.br/normas/visualizar/resolucoes/BR/2002/1638> [Accessed  
289 30 Dec 2019].
- 290 4. Gisev N, Bell JS, Chen TF. Interrater agreement and interrater reliability: Key  
291 concepts, approaches, and applications. *Research in Social and Administrative*  
292 *Pharmacy*. 2013; **9**:330-338. doi: 10.1016/j.sapharm.2012.04.004.
- 293 5. Bajpai S, Bajpai R, Chaturvedi HK. Evaluation of Inter-Rater Agreement and  
294 Inter-Rater Reliability for Observational Data: An Overview of Concepts and  
295 Methods. *Journal of the Indian Academy of Applied Psychology*. 2015, **41** (3):  
296 20-27.
- 297 6. Lilford R, Edwards A, Girling A, Hofer T, Di Tanna GL, Petty J, *et al*. Inter-rater  
298 reliability of case-note audit: a systematic review. *J Health Serv Res Policy*.  
299 2007;**12**(3):173–80. doi: 10.1258/135581907781543012
- 300 7. Thomas EJ, Lipsitz SR, Studdert DM, Brennan TA. The reliability of medical  
301 record review for estimating adverse event rates. *Ann Intern Med*.  
302 2002;**136**(11):812–6. doi: 10.7326/0003-4819-136-11-200206040-00009
- 303
- 304 8. Yawn BP, Wollan P. Interrater Reliability: Completing the Methods Description in  
305 Medical Records Review Studies. *Am J Epidemiol*. 2005;**161**(10):974–7. doi:  
306 10.1093/aje/kwi122
- 307 9. Liddy C, Wiens M, Hogg W. Methods to achieve high interrater reliability in data  
308 collection from primary care medical records. *Ann Fam Med* 2011;**9**:57-62.doi:  
309 10.1370/afm.1195
- 310
- 311 10. Cohen J. A Coefficient of Agreement for Nominal Scales. *Educational and*  
312 *Psychological Measurement*. 1960;**20**(1):37–46. doi:  
313 10.1177/001316446002000104

- 314 11. Zec S, Soriani N, Comoretto R, Baldi I. High Agreement and High Prevalence:  
315 The Paradox of Cohen's Kappa. *The Open Nursing Journal*. 2017, **11**, (Suppl-1,  
316 M5) 211-218. doi: 10.2174/1874434601711010211
- 317 12. Eugenio BD, Glass M. The Kappa Statistic: A Second Look. *Computational*  
318 *Linguistics*. 2004;**30**(1):95–101. doi: 10.1162/089120104773633402
- 319 13. Wongpakaran N, Wongpakaran T, Wedding D, Gwet KL. A comparison of  
320 Cohen's Kappa and Gwet's AC1 when calculating inter-rater reliability  
321 coefficients: a study conducted with personality disorder samples. *BMC Medical*  
322 *Research Methodology*. 2013; **13**:61. doi:10.1186/1471-2288-13-61.
- 323 14. Gwet KL. Handbook of inter-rater reliability: the definitive guide to measuring the  
324 extent of agreement among raters. 4. ed. Gaithersburg, MD: Advanced Analytics,  
325 LLC; 2014.
- 326 15. Bracco MM, Mafra ACCN, Abdo AH, Colugnati FAB, Dalla MDB, Demarzo  
327 MMP, et al. Implementation of integration strategies between primary care units  
328 and a regional general hospital in Brazil to update and connect health care  
329 professionals: a quasi-experimental study protocol. *BMC Health Serv Res* 2016;  
330 **16**:380. doi: 10.1186/s12913-016-1626-9
- 331 16. Prentice RL, Zhao LP. Estimating equations for parameters in means and  
332 covariances of multivariate discrete and continuous responses. *Biometrics*  
333 1991;**47**(3):825–39. doi: 10.2307/2532642
- 334 17. Liang K-Y, Zeger SL. Longitudinal data analysis using generalized linear models.  
335 *Biometrika* 1986;**73**(1):13–22. doi: 10.1093/biomet/73.1.13
- 336 18. Altman DG. Practical statistics for medical research. 1st ed. London: Chapman and  
337 Hall; 1991



- 338 19. R Core Team (2019). R: A Language and Environment for Statistical Computing.  
339 R Foundation for Statistical Computing. Vienna. Austria. Available:  
340 <http://www.R-project.org/>. [Accessed 30 Dec 2019].
- 341 20. Højsgaard S, Halekoh U, Yan J. The R Package geepack for Generalized Estimating  
342 Equations. *Journal of Statistical Software* 2005; **15**:2. doi: 10.18637/jss.v015.i02.
- 343 21. PlataformaBrasil. Availabe: <http://aplicacao.saude.gov.br/plataformabrasil/login.jsf>.  
344 [Accessed 15 Apr 2019].
- 345 22. Walter SD, Eliasziw M, Donner A. Sample size and optimal designs for reliability  
346 studies. *Stat Med*. 1998;**17**(1):101–10. doi:10.1002/(SICI)1097-  
347 0258(19980115)17:1<101::AID-SIM727>3.0.CO;2-E.
- 348 23. Stemler, SE. A comparison of consensus, consistency, and measurement approaches  
349 to estimating interrater reliability. *Practical Assessment, Research & Evaluation*.  
350 2004, **9**:4.
- 351 24. Hill EG, Slate EH. A semi-parametric Bayesian model of inter- and intra-examiner  
352 agreement for periodontal probing depth. *Ann Appl Stat*.2014;**8**(1):331–51. doi:  
353 0.1214/13-AOAS688
- 354 25. Williamson JM, Lipsitz SR, Manatunga AK. Modeling kappa for measuring  
355 dependent categorical agreement data. *Biostatistics* 2000;**1**(2):191–202. doi:  
356 10.1093/biostatistics/1.2.191.

357

358

359 **Figure 1:** Estimated percent agreement (PA) and Gwet’s AC1 with respective 95%  
360 confidence intervals (CIs), by audited item, throughout the study period.

361

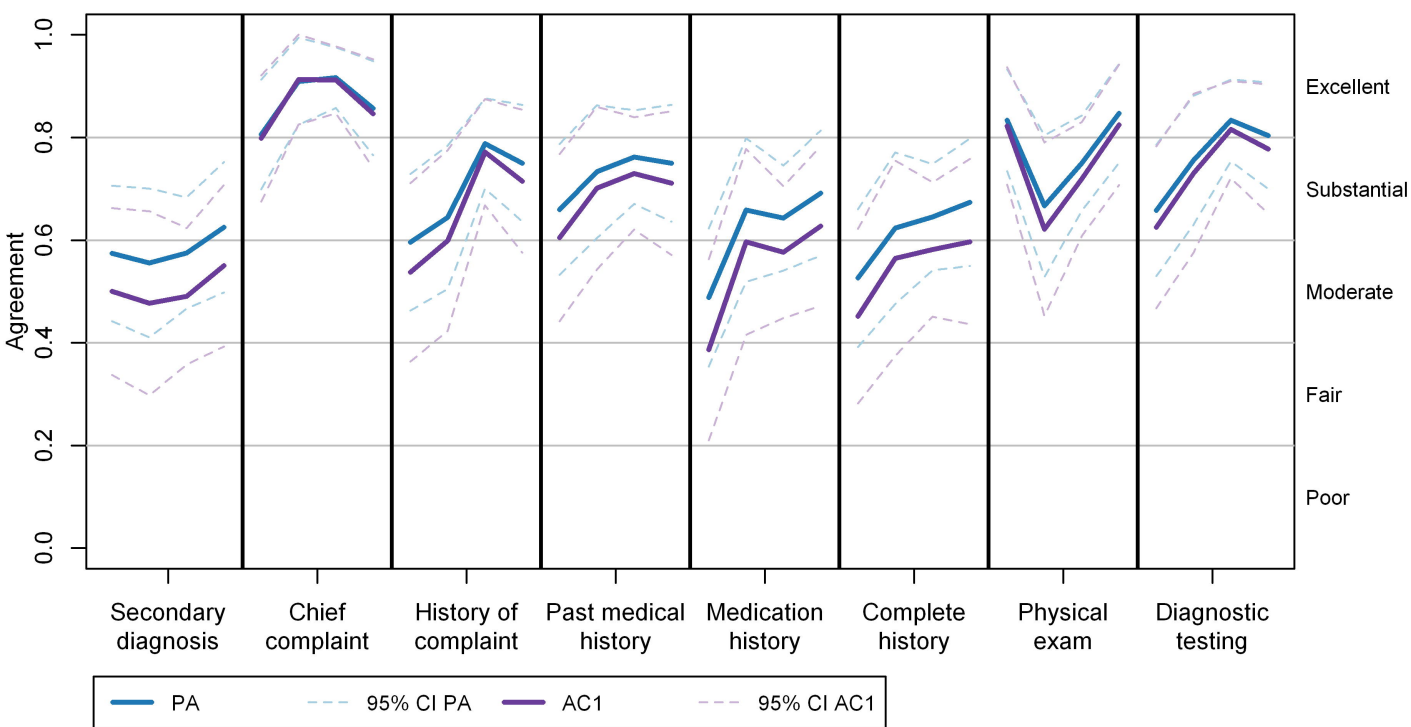

Source: https://www.medrxiv.org/content/10.1101/2020.01.21.20018325v1.full.pdf
